# Supplementary material
Source: PubMed Central journal article supplement (PMC4373084)
Supplement: NIHMS671379-supplement-Supplemental.pdf [file NIHMS671379-supplement-Supplemental.pdf]

**Supplementary Material:****Supplementary Table 1: Gender and Brain Involvement in Trends**

| <b>Total Neurological Scores</b> | Worsening | Stable | Improving |
|----------------------------------|-----------|--------|-----------|
| Brain Involvement                |           |        |           |
| Bilateral/Unilateral             | 4/13      | 0/6    | 1/11      |
| Gender                           |           |        |           |
| Male/Female                      | 9/8       | 2/4    | 9/3       |
| <b>Seizure Subscore</b>          | Worsening | Stable | Improving |
| Brain Involvement                |           |        |           |
| Bilateral/Unilateral             | 2/10      | 2/10   | 1/10      |
| Gender                           |           |        |           |
| Male/Female                      | 7/5       | 6/6    | 7/4       |
| <b>Cognitive Function Score</b>  | Worsening | Stable | Improving |
| Brain Involvement                |           |        |           |
| Bilateral/Unilateral             | 5/12      | 0/15   | 0/3       |
| Gender                           |           |        |           |
| Male/Female                      | 11/6      | 6/9    | 3/0       |
| <b>Hemiparesis Score</b>         | Worsening | Stable | Improving |
| Brain Involvement                |           |        |           |
| Bilateral/Unilateral             | 1/8       | 3/15   | 1/7       |
| Gender                           |           |        |           |
| Male/Female                      | 6/3       | 9/9    | 5/3       |

**Supplemental Table 2: Subgroup 3 – Presymptomatic Aspirin Neuroscores**

| <b>Subject</b> | <b>Age of NS<br/>(months)</b> | <b>SZ</b> | <b>HP</b> | <b>VFC</b> | <b>CF</b> | <b>Total</b> | <b>NS on ASA?</b> | <b>Pre-ASA Symptoms</b>                       |
|----------------|-------------------------------|-----------|-----------|------------|-----------|--------------|-------------------|-----------------------------------------------|
| 1              | 79                            | 1         | 1         | 0          | 3         | 5            | Yes               | Glaucoma, Stroke-like episode,<br>hemiparesis |
| 2              | 80                            | 2         | 0         | 0          | 2         | 4            | Yes               | Glaucoma, Early handedness                    |
| 3              | 57                            | 4         | 3         | 2          | 2         | 11           | Yes               | Glaucoma, Visual gaze<br>preference           |
| 4              | 66                            | 2         | 3         | 2          | 0         | 7            | Yes               | Glaucoma                                      |
| 5              | 3                             | 2         | 1         | 1          | 0         | 4            | No*               | Glaucoma, Visual gaze<br>preference           |

\* Subject was taken off aspirin when there was a concern about an allergic reaction that resolved itself immediately after discontinuing aspirin.

(Abbreviations: NS – Neurological Score, SZ – Seizure subscore, HP – Hemiparesis subscore, VFC – Visual Field Cut subscore, CF – Cognitive Function subscore, ASA – Aspirin).
